# Supplementary material for: Morphology-dependent photoelectrochemical properties of multi-scale layered Bi(C2O4)OH
Source: Royal Society of Chemistry journal article supplement (doi:10.1039/c6ra00917d), 2016-01-01
Supplement: c6ra00917d1.pdf [file c6ra00917d1.pdf]

Supporting information for

## **Morphology-Dependent Photoelectrochemistry Properties of Multi-Scale Layered Bi(C<sub>2</sub>O<sub>4</sub>)OH Compound**

Juan Xu,<sup>a</sup> Fei Teng,<sup>a\*</sup> Wenqing Yao<sup>b</sup>, Yongfa, Zhu<sup>b</sup>

*<sup>a</sup>Jiangsu Engineering and Technology Research Center of Environmental Cleaning Materials (ECM), Jiangsu Key Laboratory of Atmospheric Environment Monitoring and Pollution Control (AEMPC), Jiangsu Joint Laboratory of Atmospheric Pollution Control (APC), Collaborative Innovation Center of Atmospheric Environment and Equipment Technology (AEET), School of Environmental Science and Engineering, Nanjing University of Information Science & Technology, 219 Ningliu Road, Nanjing 210044, China*

*<sup>b</sup>Chemistry Department, Tsinghua University, Beijing 100082, China*

---

\* Corresponding author. Tel./Fax.: +86-25-58731090; Email address: tfwd@163.com

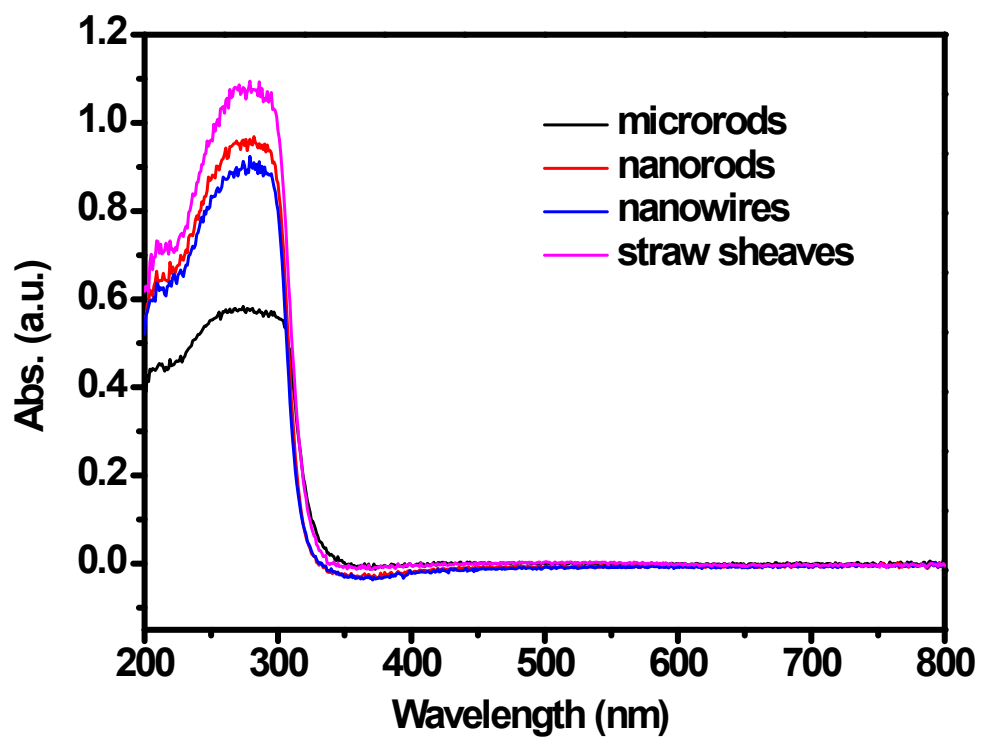

**Fig. S1** The UV-vis diffuse reflectance spectra of Bi(C<sub>2</sub>O<sub>4</sub>)OH samples
